# Supplementary material for: Air-stable ambipolar organic field-effect transistors based on naphthalenediimide–diketopyrrolopyrrole copolymers
Source: Royal Society of Chemistry journal article supplement (doi:10.1039/c5ra00391a), 2015-01-01
Supplement: c5ra00391a1.pdf [file c5ra00391a1.pdf]

## Supporting Information

# Air-stable Ambipolar Organic Field-Effect Transistors Based on Naphthalenediimide-Diketopyrrolopyrrole Copolymers

Ping Wang,<sup>a</sup> Hui Li,<sup>b</sup> Chunling Gu,<sup>b</sup> Huanli Dong,<sup>b</sup> Zhenzhen Xu,<sup>a</sup> and  
Hongbing Fu<sup>\*ab</sup>

<sup>a</sup> Beijing Key Laboratory for Optical Materials and Photonic Devices Department of  
Chemistry, Capital Normal University, Beijing 100048, P. R. China

<sup>b</sup> Beijing National Laboratory for Molecular Sciences (BNLMS), Institute of  
chemistry, Chinese Academy of Sciences, Beijing 100190, P. R. China.

\*Corresponding author: Tel: +86 10 68907107, Fax: +86 10 68907107,

E-mail : \* [hongbing.fu@iccas.ac.cn](mailto:hongbing.fu@iccas.ac.cn)

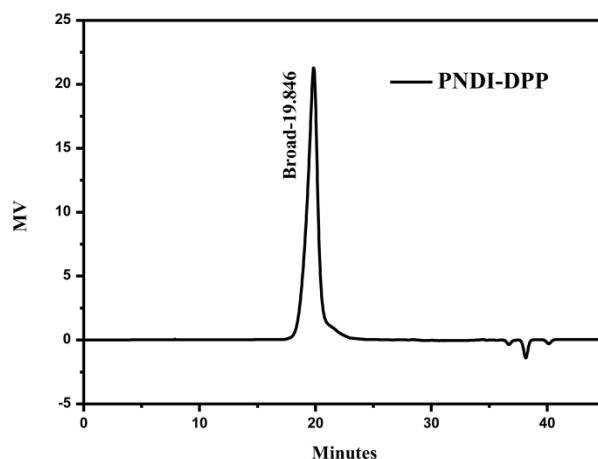

**GPC Results**

|   | Dist Name | Elution Volume (ml) | Retention Time (min) | Adjusted RT (min) | Mn    | Mw    | MP | Mz    | Mz+1  | Mz/Mw    |
|---|-----------|---------------------|----------------------|-------------------|-------|-------|----|-------|-------|----------|
| 1 |           | 19.846              | 19.846               | 19.846            | 16606 | 20844 |    | 23455 | 24941 | 1.125271 |

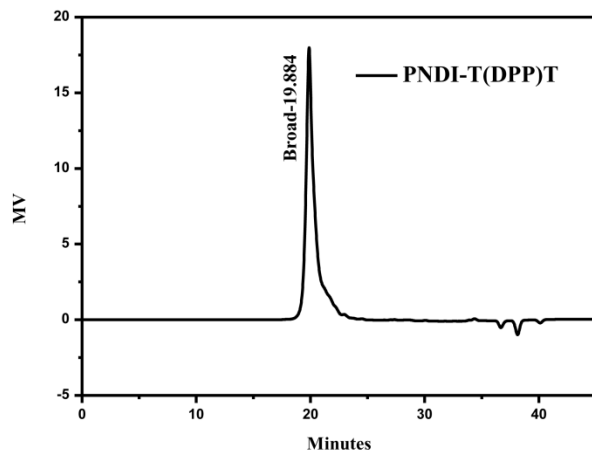

**GPC Results**

|   | Dist Name | Elution Volume (ml) | Retention Time (min) | Adjusted RT (min) | Mn   | Mw    | MP | Mz    | Mz+1  | Mz/Mw    |
|---|-----------|---------------------|----------------------|-------------------|------|-------|----|-------|-------|----------|
| 1 |           | 19.884              | 19.884               | 19.884            | 9714 | 16531 |    | 20986 | 23367 | 1.269523 |

**Figure S1:** GPC trace of PNDI-DPP and PNDI-T(DPP)T.

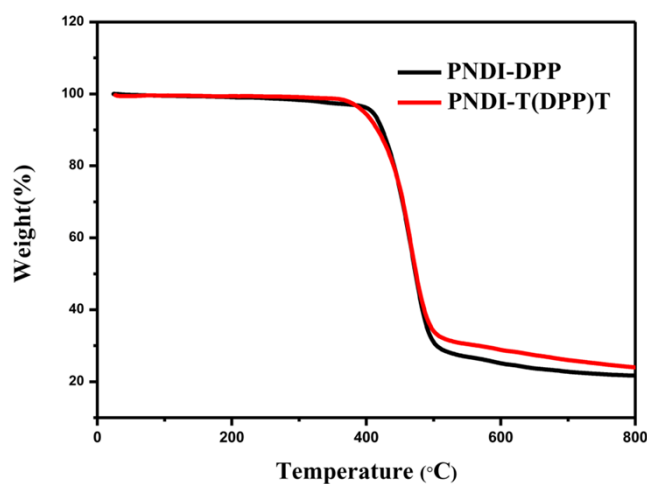

**Figure S2:** TGA thermograms of PNDI-DPP and PNDI-T(DPP)T.

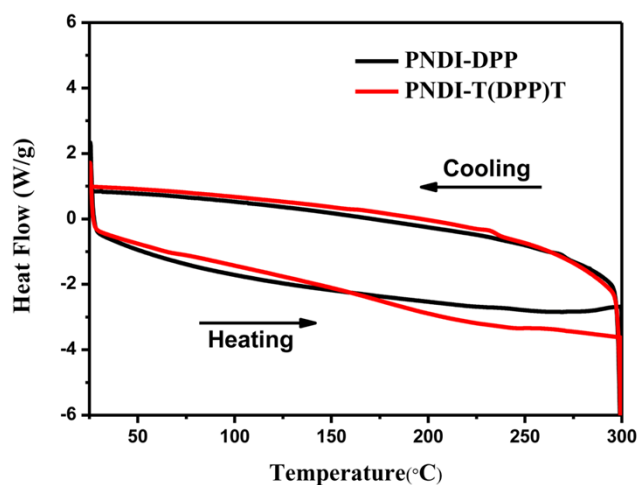

**Figure S3:** DSC thermograms of PNDI-DPP and PNDI-T(DPP)T.

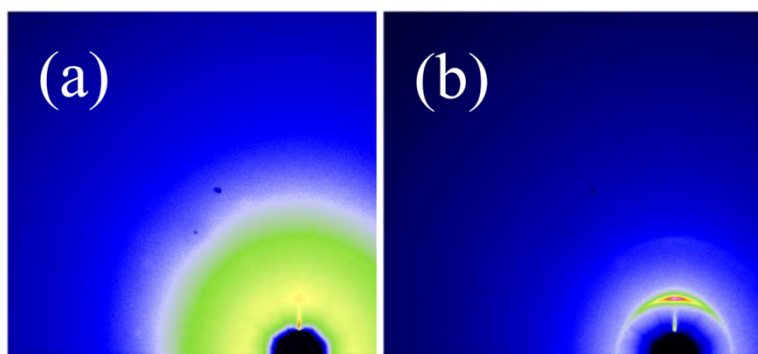

**Figure S4:** 2D-GIXRD images of the **PNDI-DPP** thin film (a) and **PNDI-T(DPP)T** thin film (b).

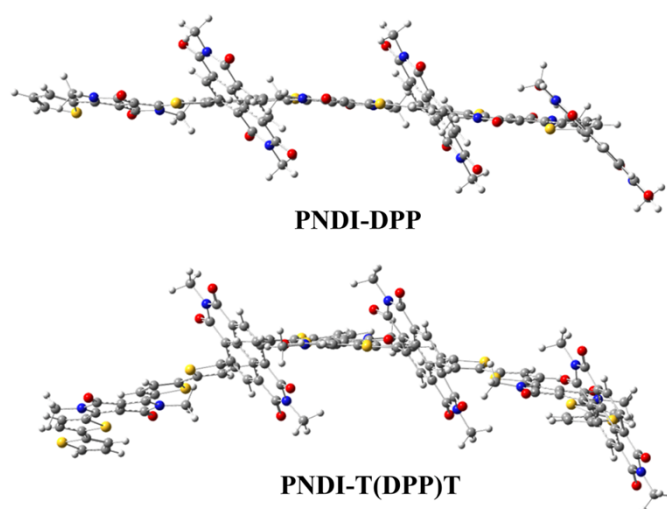

**Figure S5:** The preferred conformations of the trimmers of **PNDI-DPP** and **PNDI-T(DPP)T** obtained with DFT calculation.

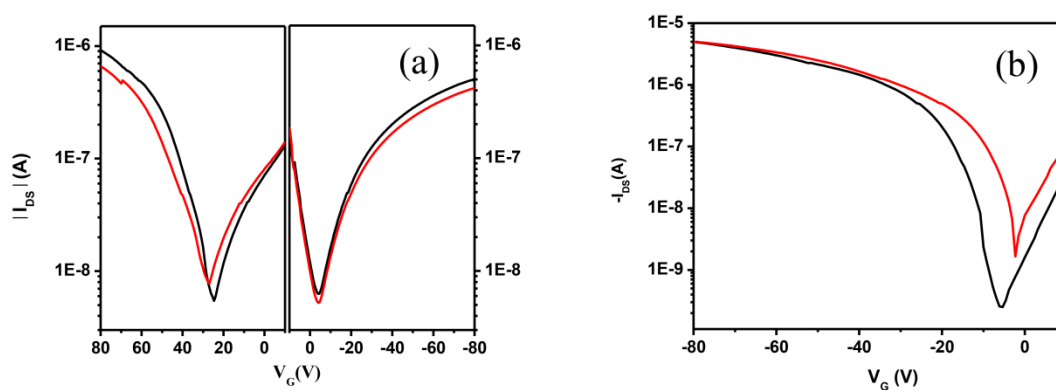

**Figure S6:** OFET transfer curves for fresh **PNDI-DPP** (a) and **PNDI-T(DPP)T** (b) based devices (dark line) and after 3 months storage in ambient (red line).

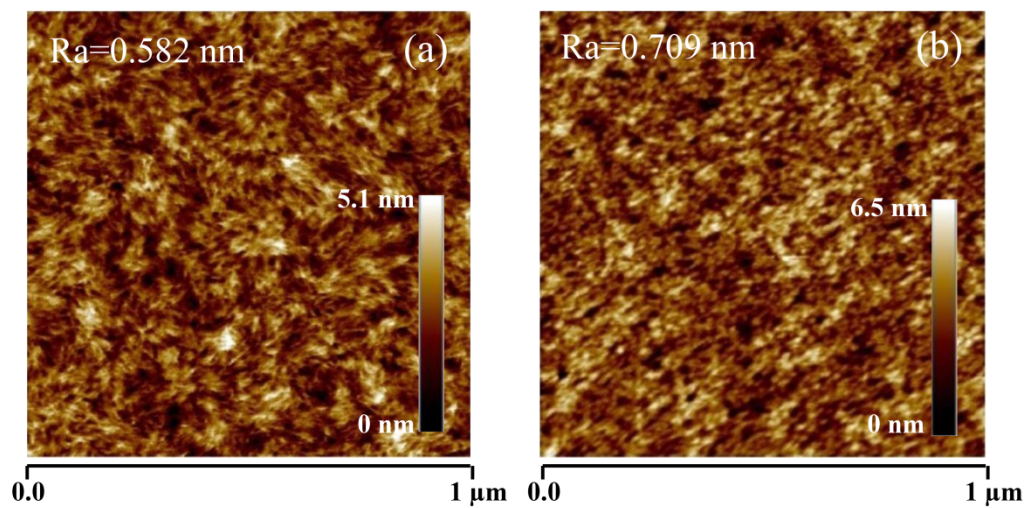

**Figure S7:** Tapping mode AFM height images of **PNDI-DPP** (a) and **PNDI-T(DPP)T** (b) thin films.
